# 1 **Disruption of the gut microbiota attenuates epithelial ovarian cancer sensitivity to cisplatin** 2 **therapy**

3 Laura M. Chambers<sup>1, \*</sup>, Emily L. Esakov<sup>2, \*</sup>, Chad Braley<sup>2</sup>, Lexie Trestan<sup>2</sup>, Zahraa Alali<sup>2</sup>, Defne Bayik<sup>2</sup>,  
4 Justin D. Lathia<sup>2,8</sup>, Naseer Sangwan<sup>3</sup>, Peter Bazeley<sup>4</sup>, Amy S. Joehlin-Price<sup>6</sup>, Mohammed Dwidar<sup>5</sup>,  
5 Adeline Hajjar<sup>7</sup>, Philip P. Ahern<sup>2</sup>, Jan Claesen<sup>2</sup>, Peter Rose<sup>1</sup>, Roberto Vargas<sup>1</sup>, Chad Michener<sup>1</sup>, Ofer  
6 Reizes<sup>2, 8, +</sup>

7  
8 <sup>1</sup>Division of Gynecologic Oncology; Obstetrics, Gynecology and Women's Health Institute, Cleveland  
9 Clinic, Cleveland, OH

10 <sup>2</sup>Department of Cardiovascular and Metabolic Sciences, Center for Microbiome and Human Health,  
11 Lerner Research Institute, Cleveland Clinic, Cleveland, OH

12 <sup>3</sup>Microbiome Analytics and Composition Core Facility, Center for Microbiome and Human Health,  
13 Lerner Research Institute, Cleveland Clinic Foundation, Cleveland, OH

14 <sup>4</sup>Department of Quantitative Health Services, Lerner Research Institute, Cleveland Clinic Foundation,  
15 Cleveland OH

16 <sup>5</sup>Microbial Culture and Engineering Facility, Center for Microbiome and Human Health, Lerner  
17 Research Institute, Cleveland Clinic Foundation, Cleveland OH

18 <sup>6</sup>Department of Gynecologic Pathology, Pathology and Lab Medicine Institute, Cleveland Clinic  
19 Foundation, Cleveland OH

20 <sup>7</sup>Gnotobiotic Core Facility, Center for Microbiome and Human Health, Lerner Research Institute,  
21 Cleveland Clinic Foundation, Cleveland, OH

22 <sup>8</sup>Case Comprehensive Cancer Center, Case Western Reserve University, Cleveland, OH

23 \*Co-First Authors

24 +Corresponding Author

25 Ofer Reizes, PhD

26 Lerner Research Institute

27 9500 Euclid Avenue, Cleveland, OH 44195

28 Email: [reizeso@ccf.org](mailto:reizeso@ccf.org)

29 Telephone: +1(216) 215-088

30  
31 Conflicts of Interest: The authors have declared that no conflict of interest exists.

32 **Abstract**

33 **Background:** Epithelial Ovarian Cancer (EOC) is the second most common gynecologic malignancy  
34 in the United States, but the leading cause of gynecologic cancer death. Despite many achieving  
35 remission with first-line therapy, up to 80% of patients will recur and require additional treatment.  
36 Antibiotic therapy is frequently used during cancer treatments for both prophylaxis and treatment of  
37 infections, although this profoundly impacts the gut microbiome. Multiple studies suggest that an  
38 unperturbed gut microbiome may provide a protective microenvironment, and disruption may be  
39 permissive to tumor growth and chemotherapy resistance, including platinum agents.

40 **Experimental Design:** We assessed whether antibiotic therapy would impact growth of EOC and  
41 sensitivity to cisplatin in murine models. Immune competent or compromised mice were given either  
42 metronidazole, ampicillin, vancomycin, and neomycin (ABX) containing or control water for two weeks  
43 before being intraperitoneally injected with murine ID8 or ID8-VEGF EOC cells. Tumors were  
44 monitored and cisplatin therapy was administered weekly until endpoint. Stool was collected  
45 throughout the study to assess for microbial population effects over time.

46 **Results:** Both immune competent and immune compromised ID8 and ID8 VEGF tumor-bearing mice  
47 demonstrated a decreased response to cisplatin therapy in ABX treated groups with an increase in  
48 overall tumor burden. RNAseq analysis showed enrichment of multiple cell proliferation and stem cell  
49 pathways, and stem cell genes SOX2, WNT and PAX2. The self-renewal of ABX treated tumor cells  
50 was also increased.

51 **Conclusion:** Collectively, these studies indicate an intact microbiome provides a tumor suppressive  
52 microenvironment and enhances sensitivity to cisplatin.

## 56 **Introduction**

57 Epithelial ovarian, peritoneal and fallopian tube carcinomas (EOC) are a leading cause of gynecologic  
58 cancer related death (1). Following EOC diagnosis, patients are treated with a combination of  
59 cytoreductive surgery and platinum-taxane based chemotherapy (2-8). Unfortunately, despite many  
60 women achieving remission with first-line therapy, up to 80% of patients will recur and require  
61 additional treatment (2-8). After disease recurrence, the interval from last treatment with platinum  
62 chemotherapy has important therapeutic and prognostic implications (9). Patients with platinum  
63 resistant EOC have fewer treatment options, reduced response rates to chemotherapy and poor  
64 prognosis compared to those with platinum sensitive disease (9). There is a significant unmet need to  
65 further understand the mechanisms of platinum resistance in EOC and to advance current therapeutic  
66 options for these patients.

67 The gut microbiome has many roles in maintenance of human health, and has been increasingly  
68 linked with many disease states, including cancer (10-18). Recent evidence suggests that the gut  
69 microbiome may modulate responses to cancer treatment, including traditional chemotherapy and  
70 immunotherapy (10-19). In a study by Routy et al, resistance to immune checkpoint inhibitors was  
71 linked to abnormal gut microbiome composition following treatment with antibiotics (18). Similarly, Iida  
72 et al. evaluated the role of the gut microbiome upon platinum chemotherapy response in mice with  
73 lymphoma, colon cancer and melanoma tumors (14). In mice treated with antibiotics that induce  
74 disruption of the microbiome, the impact of oxaliplatin treatment was attenuated, with decreased  
75 tumor regression and worse survival, compared to non-antibiotic control animals.

76 Antibiotic therapy is frequently used during cancer treatments for both prophylaxis and treatment of  
77 infections. Studies have demonstrated that receipt of antibiotics during both systemic chemotherapy  
78 and immunotherapy negatively impacts oncologic outcomes. In a study of patients with relapsed  
79 lymphoma and leukemia receiving either cisplatin or cyclophosphamide on two clinical trials, those  
80 that received antibiotics against gram positive bacteria during platinum chemotherapy had a  
81 significant reduction in overall treatment response, time to recurrence and overall survival (17).

32 Among patients with epithelial ovarian cancer, studies have demonstrated that treatment for surgical  
33 site infection following primary cytoreductive surgery is associated with worse survival (20). In a  
34 recent retrospective analysis, EOC patients who received antibiotics, primarily against gram positive  
35 bacteria, during primary platinum chemotherapy had reduced overall (>17 months) and progression  
36 free survival (>24 months) compared to patients who received no antibiotic intervention (21). These  
37 studies suggest that an unperturbed gut microbiome may provide a protective microenvironment, and  
38 disruption may be permissive to tumor growth and chemotherapy resistance, including platinum  
39 agents. Here, we investigated the impact of antibiotic mediated disruption of the gut microbiome on  
40 EOC tumor growth and platinum chemotherapy response in pre-clinical models of EOC.

## Results

### EOC tumors exhibit accelerated growth and attenuated sensitivity to cisplatin in antibiotic treated mice.

We tested the hypothesis that an antibiotic driven disruption of the microbiome impacts tumor development and chemotherapy sensitivity in EOC. To this end, the following study paradigm (**Figure 1A**) was implemented wherein C57 BL/6J (BL/6) female mice at 6 weeks of age were provided water or antibiotic containing water (ABX; ampicillin, neomycin, metronidazole, and vancomycin), which was sustained for the duration of the study. After 2 weeks, mice were injected intraperitoneally (IP) with murine EOC lines ID8 or ID8-VEGF, syngeneic with BL/6 mice, and tumor growth was monitored by transabdominal ultrasound (TAUS) weekly for the course of the study (22). ID8 and ID8-VEGF cell lines were utilized as they are highly characterized and closely recapitulate human ovarian cancer progression. The ID8-VEGF cell line is slightly more severe causing an increase in angiogenesis and ascites development (23, 24). At 2 weeks post tumor cell injection, mice were injected IP with cisplatin or vehicle weekly for the remainder of the study. Mice met study endpoint at tumor burden of  $>150\text{mm}^3$  or humane endpoint, including debilitating ascites development. Upon necropsy, EOC tumor phenotype was confirmed through histological assessment of H&E stained tissue sections as well as benign adjacent omentum (**Supplemental Figure 1A**). Our findings indicate that EOC tumor growth is significantly increased by ABX treated mice compared to controls. In the presence of ABX, cisplatin therapy had attenuated efficacy compared to in the control treated mice indicating development of cisplatin resistance (**Figure 1 B, D**). As expected from the tumor burden, median survival was decreased in the ABX treatment groups compared to controls. The ID8 cohort exhibited a median survival of 66 and 64 days in the ABX placebo and cisplatin groups compared to 68.5 and 84 days in the H<sub>2</sub>O placebo and cisplatin groups, respectively (**Figure 1 C**). This result was paralleled in the ID8-VEGF cohort of mice with a median survival of 39 and 34 days in the ABX placebo and cisplatin groups compared to 42 and 53 days in the H<sub>2</sub>O placebo and cisplatin groups respectively

33 **(Figure 1 E)**. The ID8-VEGF mice reached the endpoint earlier than the ID8 cohort secondary to  
34 large volume ascites development.

35 **Limited impact on immune populations in ascites of EOC by broad spectrum antibiotics.**

36 The majority of EOC patients present with advanced disease (stage III or stage IV) that may include  
37 ascites (25, 26). Although the underlying mechanisms of ascites development are largely unknown,  
38 previous studies have reported that immune cells such as Th17 T cells, NK cells and macrophages  
39 found in peritoneal ascites may play a key role in tumor cell invasiveness and growth (27-30). To this  
40 end, we analyzed the immune cell populations within the peritoneal ascites fluid through flow  
41 cytometry. Our flow cytometry evaluation of immune cell populations within the peritoneal ascites was  
42 designed to focus on both myeloid and lymphoid populations (see **Supplemental Figure 2** for  
43 antibody panels and gating strategies). Our findings indicated no significant difference in myeloid  
44 **(Supplemental Figure 3A)** or lymphoid **(Supplemental Figure 3B)** cell populations following ABX  
45 therapy in the presence or absence of cisplatin therapy in the BL/6 ID8-VEGF cohort ascites collected  
46 at endpoint.

47 **Disruption of the immune system does not significantly impact the accelerated EOC tumor**  
48 **growth or reduced cisplatin sensitivity in antibiotic treated mice.**

49 To further assess whether the observed augmentation of tumor phenotype and cisplatin resistance  
50 following ABX treatment is dependent on an intact immune system, the same study paradigm was  
51 utilized in NOD.Cg-Prkdc<sup>scid</sup>Il2rg<sup>tm1Wjl</sup>SzJ (NSG) immuno-deficient mice. The NSG cohort  
52 displayed more significant impact of microbiome depletion through antibiotics on tumor growth as the  
53 BL/6 cohort, with no clinical benefit to the mice receiving cisplatin along with ABX **(Figure 2 A, C)**.  
54 The time to tumor progression was accelerated and the effect on median survival was even more  
55 dramatic with the ID8 cohort exhibiting a median survival of 41 and 45 days in the ABX placebo and  
56 cisplatin groups compared to 55 and 69 days in the H<sub>2</sub>O placebo and cisplatin groups respectively  
57 **(Figure 2 B)**. A similar phenotype was observed in the ID8-VEGF cohort of NSG mice **(Figure 2 D)**.  
58 As before, EOC tumors were confirmed via H&E staining **(Supplemental Figure 1B)**. Additionally,

the peritoneal ascites fluid at endpoint was analyzed by flow cytometry. NSG mice have immature T cells, DCs and macrophages, but functional neutrophils (31). NSG ID8-VEGF cohort ascites exhibited no significant alterations in myeloid (**Supplemental Figure 3 C**) populations in ABX treated mice, regardless of cisplatin therapy compared to H<sub>2</sub>O controls.

**ABX treatment results in comparable disruptions of the gut microbiome in BL/6 and NSG EOC tumor bearing mice.**

The ABX treatment regimen we applied was previously shown to be sufficient to deplete detectable commensal bacteria (32, 33). However, to define the response of the gut microbiome to broad spectrum antibiotic therapy, stool was collected at baseline, at 2 weeks, at tumor engraftment, at 5 weeks and at endpoint necropsy and then processed for 16S rRNA gene sequencing. The microbiome was analyzed from the following cohorts: BL/6 ID8 BL/6 ID8-VEGF, NSG ID8, and NSG ID8-VEGF.

**C57 BL/6 cohort.** In total, 2,801,471 and 2,411,554 high-quality and usable reads were obtained from fecal samples of 5 mice per treatment group in the ID8 and ID8-VEGF BL/6 cohorts from sequencing the 16S rRNA gene, with an average length of 210 base pairs (bps). There were 3,184 amplified sequence variants (ASVs) in all ID8 and ID8-VEGF BL/6 samples. Pairwise comparisons within both the ID8-VEGF and ID8 cohorts revealed statistically significant differences in alpha diversity between temporal collections, as analyzed by the Shannon diversity index (ANOVA  $p < 0.05$ ) (**Supplemental Figure 4 A, B**). Additionally, the Bray-Curtis dissimilarity based beta diversity comparisons between collection time points in the ID8-VEGF and ID8 cohorts were significant at  $p = 0.003$  and  $p = 0.001$  respectively (**Supplemental Figure 4 C, D**).

Antibiotic treated groups displayed significantly less diverse fecal microbial communities compared to control water treated groups regardless of cisplatin therapy. Specifically, the relative abundance of some *Proteobacteria* including *Enterobacteriaceae* and *Parasutterella* was increased in the antibiotic treated ID8 groups while the abundance of *Enterobacteriaceae* was increased in the antibiotic treated ID8-VEGF groups (**Figure 3 A, B**). These were significantly increased by 2 weeks post antibiotic

therapy in the mice being co treated with cisplatin, but took up to 5 weeks for the mice treated with placebo to obtain the same increase. Being Gram-negative, and mostly facultative anaerobes, the *Proteobacteria* are generally resistant to vancomycin which affects mainly Gram-positive bacteria and are also less susceptible to metronidazole which affects more the anaerobes (34). Furthermore, *Enterobacteriaceae* have multiple antibiotic resistance genes allowing for their survival post ABX therapy (35, 36). Increased abundance of *Parasutterella* has been associated with dysbiosis of the gut microbiome, but the mechanism has not been fully interrogated (37, 38).

**NSG cohort.** In total, 4,784,498 and 2,822,423 high-quality and usable reads were obtained from fecal samples of 5 mice per treatment group in the ID8 and ID8-VEGF NSG cohorts from sequencing the 16S rRNA gene, with an average length 210 bps. There were 6,484 ASVs in all ID8 and ID8-VEGF NSG samples. As with the BL/6 cohort, the pairwise comparisons revealed statistically significant (ANOVA,  $p < 0.05$ ) patterns for alpha diversity (i.e. Shannon Index) between the collection time points in both the ID8-VEGF and ID8 cohorts (**Supplemental Figure 5 A, B**). Additionally, the Bray-Curtis dissimilarity based beta diversity between collection time points in the ID8-VEGF and ID8 cohorts were both significant at  $p = 0.001$  (**Supplemental Figure 5 C, D**).

Similar to the BL/6 cohort, the NSG cohort exhibited a marked relative increase in *Enterobacteriaceae* in the antibiotic treated ID8 and ID8-VEGF groups' fecal samples, increasing more quickly in the Cisplatin treated groups compared to the placebo as well. In addition, this cohort also saw a marked relative increase in *Paenibacillus* and *Enterococcus* (**Figure 4 A, B**).

#### **ABX treatment does not significantly alter ID8 or ID8-VEGF EOC tumor cell proliferation *in vitro***

To determine if tumor growth was a direct effect of ABX interaction with the EOC ID8 and ID8-VEGF cell lines, we performed tissue culture analyses. ID8 and ID8-VEGF cell lines were co-cultured with various concentrations of ABX (metronidazole, vancomycin, ampicillin and neomycin) in the same respective ratios utilized in the murine studies. Following 7 days culture, there were no appreciable differences in ABX treated cell lines compared to cell lines in normal media (**Supplemental Figure 6**



11 **A, B**). Additionally, there were no changes in the determined IC<sub>50</sub> of cisplatin on ID8 of ID8-VEGF  
12 cells following ABX treatment when compared to controls (**Supplemental Figure 6 C, D**).

13 **Antibiotic treatment leads to accelerated tumor growth and attenuated sensitivity to cisplatin**  
14 **in patient derived EOC.**

15 To ensure our observed phenotype was not unique to syngeneic EOC cell lines (ID8 and ID8-VEGF).  
16 We repeated our study paradigm in NSG mice with a human derived OV81 cell line. Following 2  
17 weeks of ABX or control water, mice were IP injected with 5x10<sup>6</sup> OV81 cells. To monitor tumor  
18 growth in this cohort of mice, cells were transduced with a luciferase reporter prior to IP injection.  
19 Following 2 weeks IP cell injection, mice were randomized into 4 groups: H<sub>2</sub>O Vehicle, H<sub>2</sub>O Cisplatin,  
20 ABX Vehicle, and ABX Cisplatin and treated as previously outlined. At endpoint, mice underwent  
21 Perkin Elmer *in Vivo* Imaging System (IVIS) imaging and total flux of photons/second was calculated  
22 to determine total tumor burden. Overall ABX therapy resulted in a drastic increase in total tumor  
23 burden when normalized to initial tumor burden compared to H<sub>2</sub>O controls in both the vehicle and  
24 cisplatin treated groups (**Supplemental Figure 7**).

25 **ABX therapy induces a stem cell phenotype in ID8 EOC tumors in NSG mice**

26 To better understand the effect of antibiotic therapy on tumor cells and their growth in the presence  
27 and absence of cisplatin, we performed RNAseq on tumors collected from H<sub>2</sub>O Placebo, H<sub>2</sub>O  
28 Cisplatin, ABX Placebo, and ABX Cisplatin treated NSG mice at endpoint (8 weeks post ID8 cell  
29 injection). The top 100 most significantly affected genes by p-value following a pairwise comparison  
30 between the H<sub>2</sub>O Placebo and ABX Placebo groups (**Figure 5 A**) were analyzed utilizing DAVID  
31 software for the enrichment of GO terms. Interestingly, the most enriched GO terms included cell  
32 differentiation, proliferation, and locomotor activity in line with the increased self-renewal ability  
33 observed in the previous tumor sphere initiation assays (**Figure 5 B**). Genes commonly associated  
34 with cancer stem cell signatures were also increased in the ABX treatment group compared to the  
35 H<sub>2</sub>O control group such as *SOX2*, *WNT7a*, *HOXB5*, *HOXB6*, *DLX5*, *MSX1*, *EFNA4*, *SALL1*, and  
36 *PAX2* genes. *SHOX2* and *GATA5* genes that promote cell differentiation were also significantly

37 decreased (**Figure 5 C**) (39-46). Upon KEGG pathway analysis of genes with a p-value <0.01 in the  
38 ABX Placebo group vs. the H<sub>2</sub>O Placebo group, multiple signaling pathways were implicated  
39 including PI3-Akt, MAPK, WNT, and Hedgehog (**Figure 5 D**) (47-49).

40 As we observed increased stem cell markers based on RNAseq of tumors, we performed  
41 tumorsphere assays to assess stem cell frequency in tumors from H<sub>2</sub>O and ABX treated mice without  
42 and with cisplatin. Following endpoint necropsy, tumor tissue from each group was dissociated to  
43 single cells and plated in a tumor sphere formation assay. Following 14 days of incubation, sphere  
44 initiation frequency was determined demonstrating a significant increase in sphere initiation frequency  
45 of ID8 cells from ABX treated BL/6 mice compared to control H<sub>2</sub>O in both the presence and absence  
46 of cisplatin therapy (**Figure 6 A**). This observed effect was increasingly evident in the NSG cohorts  
47 demonstrating an apparent increase in the stem cell population following ABX therapy, further  
48 increased in the presence of cisplatin (**Figure 6 B**).

33

## 34 **Discussion**

35 In recent years, there has been growing evidence demonstrating a link between the gut microbiome,  
36 carcinogenesis and response to cancer therapy (11-18). Studies have emerged supporting, in both  
37 pre-clinical models and patient cohorts, that antibiotic therapy associated gut microbial disruption may  
38 negatively impact the efficacy of immune checkpoint inhibitors and systemic anti-cancer drugs,  
39 including platinum chemotherapy (12-17). To date, the impact of the gut microbiome upon response  
40 to chemotherapy in women with gynecologic malignancies is yet to be explored. In women diagnosed  
41 with EOC, platinum chemotherapy remains the standard treatment in primary and newly recurrent  
42 disease. Disease prognosis and treatment efficacy depends upon platinum sensitivity, with platinum  
43 resistance portending a poor prognosis with limited active treatment options. Interventions to increase  
44 platinum sensitivity and prevent development of resistance are essential to improving the care of  
45 women with EOC.

46 The pre-clinical studies described in this manuscript demonstrate that antibiotic therapy, and  
47 associated changes within the gut microbiome, resulted in accelerated tumor growth, attenuated  
48 cisplatin sensitivity and decreased survival. In mice who received ABX, 16S rDNA analysis  
49 demonstrated that the gut microbiome was markedly altered, compared to controls. Specifically,  
50 significantly reduced diversity in the fecal microbial communities was noted regardless of cisplatin  
51 therapy. These findings are consistent with prior studies investigating the impact of the gut  
52 microbiome upon response to platinum chemotherapy and immune checkpoint inhibitor treatment for  
53 non-gynecologic cancers. Indeed, Routy et al, showed resistance to immune checkpoint inhibitors  
54 was linked to abnormal gut microbiome composition (18). Following disruption of the gut microbiome  
55 through ABX treatment, response to CpG-oligonucleotide immunotherapy and cyclophosphamide  
56 was impaired secondary to reduced cytokine production, lower production of reactive oxygen species  
57 and diminished cytotoxicity. In a separate study, Iida et al., demonstrated that disruption of the gut

38 microbiome through ABX, impaired platinum response, with decreased tumor regression and survival,  
39 in animal models of colon cancer and lymphoma (14).

40 Similar findings have been documented in cohorts of patients undergoing platinum chemotherapy for  
41 non-gynecologic cancers. Among 800 patients enrolled on clinical trials receiving cyclophosphamide  
42 or cisplatin for chronic lymphocytic leukemia or lymphoma, receipt of ABX targeting gram positive  
43 species during chemotherapy was associated with significantly decreased treatment response, time  
44 to recurrence and survival (17). These findings suggest that certain presence of specific bacterial  
45 populations may be essential for treatment response. In our studies, we identified significantly higher  
46 relative abundance of potentially pathogenic Gram-negative *Enterobacteriaceae* and *Parasutterella*  
47 species. Notably, among animals treated with cisplatin, these bacteria were further increased, in the  
48 absence of facultative Gram-positive bacteria, to those who received placebo. Although not yet  
49 studied in relation to cancer, an increase in the abundance of *Parasutterella* has been associated with  
50 dysbiosis of the gut microbiome and alterations in liver metabolism (37, 38, 50).

51 Furthermore, in NSG mice, we identified that disruption of the immune system does not directly  
52 contribute to increased tumor growth or reduced platinum sensitivity in the setting of microbial  
53 disruption. In addition, no differences in myeloid and lymphoid populations were observed in the  
54 ascitic fluid of mice following antibiotic treatment, compared to controls. Our results identify that in  
55 the setting of an altered microbiome, response to platinum chemotherapy is reduced and populations  
56 of chemo-resistance cancer stem cells are increased through tumorsphere initiation frequency and  
57 transcriptional reprogramming to an increased cancer stem cell-like state. The relationship between  
58 enhanced populations of cancer stem cells and platinum resistance in EOC is well-documented in the  
59 literature (28, 45, 48, 51-54). Specifically, we identified *SOX2*, *WNT7a*, *HOXB5*, *HOXB6*, *DLX5*,  
60 *MSX1*, *EFNA4*, *SALL1*, and *PAX2* as being significantly upregulated in ID8 tumors of the ABX group  
61 over the control H<sub>2</sub>O group. Many of these genes are markers of pluripotency and regulation as well  
62 as markers of long-term stemness (39, 40, 42-45). *SALL1* interacts with *NANOG* a well-established  
63 pluripotency transcription factor, to suppress differentiation (44). Conversely, *SHOX2* and *GATA5*

14 genes that favor differentiation, were significantly decreased providing further evidence that ID8 tumor  
15 cells from ABX mice are more stem like and undifferentiated than ID8 tumor cells from H<sub>2</sub>O treated  
16 mice (41, 46, 55). Upon KEGG pathway analysis of enriched genes in the ABX group, multiple  
17 signaling pathways such as P13K/AKT/mTOR and WNT, were implicated and currently under  
18 investigation as targets for ovarian cancer therapies (49, 56). Further investigation is needed to  
19 understand the mechanism through which the gut microbiome interacts with cancer stem cells and  
20 how this specifically drives platinum resistance in EOC.

21 The clinical implications of the gut microbiome impacting platinum response in EOC are significant.  
22 Primarily, antibiotic therapy is often unavoidable in the care of patients with EOC following  
23 cytoreductive surgery or during chemotherapy. However, evidence supporting that antibiotic driven  
24 changes to the gut microbiome may negatively impact oncologic outcomes supports that physicians  
25 should be judicious in antibiotic selection and duration of dosing and escalate treatment where  
26 appropriate. It also supports that measures to prevent infection in women with EOC, and therefore  
27 avoid antibiotic treatments, should be prioritized. Most importantly, understanding that disruption of  
28 gut microbiota impacts EOC growth and platinum chemotherapy introduces the potential for  
29 development of targeted therapeutics, designed to restore an intact gut microbiome, which may  
30 represent promising strategies to treat EOC and combat platinum resistance in the future.

31 Collectively, we identify a role for the disruption of gut microbiota in enhanced tumor growth and  
32 reduced sensitivity to platinum chemotherapy in pre-clinical models of EOC. Further investigation is  
33 critically needed to understand how the tumor microenvironment, and cancer stem cells specifically,  
34 communicate with the gut microbiome to drive platinum resistance in EOC. Answers to these  
35 questions will provide important insights as to whether microbe directed interventions to the gut  
36 microbiome can be used to impact the response to platinum chemotherapy.

## Methods

### Cell Lines

ID8, ID8-VEGF (syngeneic) and OV81 (human) EOC cell lines were cultured in Dulbecco Modified Eagle Medium (DMEM) media containing heat inactivated 5% FBS (Atlas Biologicals Cat # F-0500-D, Lot F31E18D1) and grown under standard conditions. HEK 293T/17 (ATCC CRL-11268) cells were plated and co-transfected with Lipofectamine 3000 (L3000015 Invitrogen), 3rd generation packaging vectors pRSV-REV #12253, pMDG.2 #12259, and pMDLg/pRRE #12251 (Addgene) and lentiviral vector directing expression of luciferase reporter pHIV-Luciferase #21375 4.5 µg (Addgene). Viral particles were harvested, filtered through a 0.45 µm Durapore PVDF Membrane (Millipore SE1M003M00) and added to cell line culture media. Viral infections were carried out over 72 hours and transduced cells were selected by their resistance to 2 µg/mL puromycin (MP Biomedicals 0219453910).

### Animal Studies

Female C57BL/6J (BL/6) mice were purchased from Jackson Laboratories (Bar Harbor, ME) at 6 weeks of age. Female NOD.Cg-Prkdc<sup>scid</sup>Il2rg<sup>tm1Wjl</sup>SzJ (NSG) mice were purchased from the Cleveland Clinic BRU and Gnotobiotic Core Facility respectively at 6 weeks of age. Experimental animals were housed and handled in accordance with Cleveland Clinic Lerner Research Institute IACUC guidelines. Mice (BL/6 or NSG) were given either control or antibiotic (0.5 g/L vancomycin, 1 g/L neomycin sulfate, 1 g/L metronidazole, 1 g/L ampicillin) (ABX) (Fisher Scientific) containing water for 2 weeks prior to intraperitoneal (IP) injection of ID8-LUC ( $5 \times 10^6$ ) ID8-VEGF ( $5 \times 10^6$ ) or OV81 ( $1 \times 10^6$ ) cells. The ABX containing water has been previously shown to be sufficient to deplete all detectable commensal bacteria (32, 33). Mice remained on either control or ABX containing water for the duration of the study. At 10 weeks of age, mice were treated IP with either cisplatin (5mg/kg,

35 Spectrum Chemical or vehicle (PBS) weekly until human endpoint of total tumor burden exceeding  
36 150mm<sup>3</sup> or debilitating ascites development.

### 37 Tumor Monitoring by Trans abdominal Ultrasound (TAUS)

38 For the ID8-LUC and ID8-VEGF cohorts, TAUS surveillance was initiated seven days following IP  
39 tumor injection as previously described (22). TAUS was performed every 10 days until study  
40 endpoint. Mice were anesthetized using isoflurane (DRE Veterinary) and placed in the supine  
41 position. Following the removal of abdominal hair using Nair (Church & Dwight Co. Inc.), sterile  
42 ultrasound gel was applied to the abdomen. TAUS was performed using Vevo2100 (VisualSonics)  
43 using the abdominal imaging package and MS550D probe (40Hz). For each mouse, the abdomen  
44 was assessed for tumor in four quadrants. Tumors were noted to be absent or present at each  
45 assessment. Tumor length and width were recorded and tumor volume was calculated using the  
46 formula:  $(\text{Length} * (\text{Width}^2)) / 2$ .

### 47 Tumor Monitoring by 2D IVIS Imaging

48 For the A2780-LUC cohort of mice, bioluminescence images were taken with IVIS Lumina  
49 (PerkinElmer) using D-luciferin as previously described (57). Mice received an IP injection of D-  
50 luciferin (Goldbio LUCK-1G, 150mg/kg in 150uL) under inhaled isoflurane anesthesia. Images were  
51 analyzed (Living Image Software) and total flux reported in photons/second/cm<sup>2</sup>/steradian for each  
52 mouse abdomen. All images were obtained with a 15 second exposure.

### 53 16S rDNA Sequencing

54 At 5 pre-determined time points (baseline, 2 weeks, tumor engraftment, 5 weeks, and endpoint, see  
55 **Supplemental Figure 1** schematic), stool was collected from each mouse and frozen in micro  
56 centrifuge tubes at -80C. Upon completion of the study, 16S rDNA was isolated following the  
57 standard protocol and (QIAamp PowerFecalPro Kit) (Qiagen). Isolated samples were sent to Miami  
58 University of Ohio on dry ice for 16S V4 rDNA processing. Data analysis was completed by the  
59 Microbiome and Composition Analytics Core facility as follows: Individual fastq files without non-  
60 biological nucleotides were processed using Divisive Amplicon Denoising Algorithm (DADA) pipeline

(58). The output of the dada2 pipeline (feature table of amplicon sequence variants (an ASV table)) was processed for alpha and beta diversity analysis using *phyloseq* (59), and *microbiomeSeq* (<http://www.github.com/umerijaz/microbiomeSeq>) packages in R. Alpha diversity estimates were measured within group categories using *estimate\_richness* function of the *phyloseq* package (59). Multidimensional scaling (MDS, also known as principal coordinate analysis; PCoA) was performed using Bray-Curtis dissimilarity matrix (60) between groups and visualized by using *ggplot2* package (61). We assessed the statistical significance ( $P < 0.05$ ) throughout and whenever necessary, we adjusted *P*-values for multiple comparisons according to the Benjamini and Hochberg method to control False Discovery Rate (62) while performing multiple testing on taxa abundance according to sample categories. We performed an analysis of variance (ANOVA) among sample categories while measuring the of  $\alpha$ -diversity measures using *plot\_anova\_diversity* function in *microbiomeSeq* package (<http://www.github.com/umerijaz/microbiomeSeq>). Permutational multivariate analysis of variance (PERMANOVA) with 999 permutations was performed on all principal coordinates obtained during PCoA with the *ordination* function of the *microbiomeSeq* package. Linear regression (parametric test), and Wilcoxon (Non-parametric) test were performed on ASVs abundances against coprostanol levels using their base functions in R (63).

### Tumor RNA Sequencing

Tumors were collected at endpoint from NSG ID8 mice and snap frozen in liquid nitrogen. Prior to RNA extraction (Takara Nucleospin), tumors were crushed using ice-cold mortar and pestle under sterile conditions. Following RNA isolation, cDNA libraries were prepared by the LRI Genomics Core facility and sent to Macrogen Inc. for RNA sequencing. The RNA sequencing results were analyzed by the Cleveland Clinic Quantitative Health Sciences' Bioinformatics Consulting Service as follows: Raw sequence FASTQ files underwent read quality assessment with FASTQC (version 0.11.8, <https://www.bioinformatics.babraham.ac.uk/projects/fastqc/>) (64). Ribosomal RNA content was evaluated with SortMeRNA (version 2.1) (65). Adapter removal and quality trimming was performed with TrimGalore (version 0.5.0, <https://github.com/FelixKrueger/TrimGalore>). Adapter removed,



17 trimmed reads were aligned to the *Mus musculus* genome assembly (GRCm38 version 99,  
18 [ftp://ftp.ensembl.org/pub/release99/fasta/mus\\_musculus/dna/Mus\\_musculus.GRCm38.dna.primary\\_a](ftp://ftp.ensembl.org/pub/release99/fasta/mus_musculus/dna/Mus_musculus.GRCm38.dna.primary_a)  
19 <assembly.fa.gz>) using STAR (version 2.6.1d)(66), and duplicates were marked with picard (version  
20 2.18.27, <http://broadinstitute.github.io/picard/>). Alignments were assessed for quality with qualimap  
21 (version 2.2.2)(67) and rseqc (version 3.0.0)(68), and for library complexity saturation with preseq  
22 (version 2.0.3)(69). Aligned reads were counted at the exon level and summarized at the gene level  
23 with the featureCounts tool from the Subread package (version 1.6.4)(70), using annotations for build  
24 GRCm38  
25 (version99,[ftp://ftp.ensembl.org/pub/release99/gtf/mus\\_musculus/Mus\\_musculus.GRCm38.99.gtf.gz](ftp://ftp.ensembl.org/pub/release99/gtf/mus_musculus/Mus_musculus.GRCm38.99.gtf.gz)).  
26 Normalization and differential expression analysis was performed with the R (version 3.6.3)(71)  
27 package DESeq2 (version 1.26.0)(72). Size factor and dispersion estimation were performed with  
28 default settings. Comparison estimate p-values for H<sub>2</sub>O-Cisplatin vs. H<sub>2</sub>O-Placebo, Antibiotic-Cisplatin  
29 vs. Antibiotic-Placebo, Antibiotic-Cisplatin vs. H<sub>2</sub>O-Cisplatin, and Antibiotic-Placebo vs. H<sub>2</sub>O-Placebo  
30 were extracted using multiple testing adjustment with the method of Benjamini and Hochberg (73),  
31 and an independent filtering significance cut-off of 0.05 (74). Log<sub>2</sub>-fold change estimates for each  
32 comparison were shrunken with the function lfcShrink from the DESeq2 package, using default  
33 settings. The web tool DAVID bioinformatics database was utilized to assess the top 100 significantly  
34 expressed genes from each group comparison for enrichment of GO terms (75).

### 35 Flow Cytometry

36 Upon murine necropsy, ascites was collected and centrifuged cells were stored in freezing media  
37 (10% DMSO in FBS, Atlas Biologicals) at -80C. All single cells suspensions were thawed on ice,  
38 washed once with 2%BSA in PBS and stained with live/dead UV stain (Invitrogen) and then blocked  
39 in FACS buffer (PBS, 2% BSA) containing FcR blocking reagent at 1:50 (Miltenyi Biotec) for 15  
40 minutes. After live/dead staining and blocking, antibody cocktails for myeloid or lymphoid panels  
41 (**Supplemental Figure 2 A**), were incubated with cells at a 1:50 dilution for 20 minutes on ice before  
42 being washed and suspended in FACS buffer for analysis.

Cell populations were analyzed using an LSRFortessa (BD Biosciences), and populations were separated and quantified using FlowJo software (Tree Star Inc.). Gating methods for myeloid and lymphoid populations were performed following standardized gating strategies previously described (76, 77). For a complete gating strategies please see **Supplemental Figure 2 B**.

#### Immunohistochemical (IHC) Staining

At endpoint, tumors were excised and placed in 4% paraformaldehyde (Electron Microscopy Sciences), at room temperature for 24-48 hours and subsequently transferred to 70% ethanol and stored at 4C. Samples were then placed in paraffin blocks, sectioned, and stained with hematoxylin and eosin by the Cleveland Clinic Foundation Histology Core to confirm EOC phenotype.

#### Tumorsphere Formation Studies

Upon murine necropsy, Total tumor collected per mouse was dissociated using standard methods with a Papain dissociation kit (Worthington Biologicals). Following filtration through a 40 micron filter, single cells were counted cultured in serial dilutions in a non-adherent 96-well plate (Sarstedt) with 200  $\mu$ l serum-free DMEM/F12 medium supplemented with 20 ng/mL basic fibroblast growth factor (Invitrogen), 10 ng/mL epidermal growth factor (BioSource), and 2% B27 (vol/vol) (Invitrogen). Tumorsphere-formation was scored following 2 weeks incubation using a phase contrast microscope. The sphere initiation frequency was calculated using an extreme limiting dilution algorithm (ELDA) (<http://bioinf.wehi.edu.au/software/elda/>).

#### In vitro ABX cisplatin sensitivity studies

ID8-LUC and ID8-VEGF cells were plated at 1,000 cells per well and treated with ampicillin, vancomycin, metrinodazole, and neomycin in combinations of the same ratios used in the murine studies for 72 hours, wherein proliferation was measured using Cell Titre Glo (Promega) and compared to vehicle treated control. Additionally following incubation for 7 days with ampicillin, vancomycin, metrinodazole, and neomycin the IC<sub>50</sub> of cisplatin (Spectrum Chemical) was assessed compared to vehicle pretreated controls also utilizing Cell Titre Glo (Promega).

#### Statistics

39 All data are presented as mean +/- standard error of the mean. All statistical analysis was performed  
70 in GraphPad Prism v8. Replicate numbers and p-values are presented in figure legends.

### 71 Study Approvals

72 All murine studies were completed in accordance with the Institutional Animal Care and Use  
73 Committee guidelines, approval # 2018-2003. All studies utilizing lenti-viral particle generation were  
74 completed in accordance with the Institutional Biosafety Committee guidelines, approval #IBC0920.

### 76 **Acknowledgements**

77 The authors would like to acknowledge members of the Reizes laboratory for their collaborative effort  
78 and insight toward the completion of the studies within this manuscript, as well as the LRI Core  
79 Facilities that played a role in data collection, analysis, or interpretation of the findings presented  
30 within the manuscript including: Microbiome Analytics and Composition Core Facility, Image Core,  
31 Histology Core, and Microbial Culture and Engineering Core. DB received support from NIH F32  
32 CA243314. Dr. Reizes is the Laura J. Fogarty Endowed Chair in Uterine Cancer Research. Research  
33 in the Reizes laboratory is funded by VeloSano Bike to Cure, Center of Research Excellence in  
34 Gynecologic Cancer, and the Department of Defense.

35

36

37

38

## References

39

1. Siegel R, Naishadham D, Jemal A. Cancer statistics, 2012. *CA Cancer J Clin.* 2012;62(1):10-29.

40

2. Bian C, Yao K, Li L, Yi T, Zhao X. Primary debulking surgery vs. neoadjuvant chemotherapy followed by interval debulking surgery for patients with advanced ovarian cancer. *Arch Gynecol Obstet.* 2016;293(1):163-8.

41

3. Heintz AP, Odicino F, Maisonneuve P, Quinn MA, Benedet JL, Creasman WT, et al. Carcinoma of the ovary. FIGO 26th Annual Report on the Results of Treatment in Gynecological Cancer. *Int J Gynaecol Obstet.* 2006;95 Suppl 1:S161-92.

42

4. Kehoe S, Hook J, Nankivell M, Jayson GC, Kitchener H, Lopes T, et al. Primary chemotherapy versus primary surgery for newly diagnosed advanced ovarian cancer (CHORUS): an open-label, randomised, controlled, non-inferiority trial. *Lancet.* 2015;386(9990):249-57.

43

5. Morrison J, Haldar K, Kehoe S, Lawrie TA. Chemotherapy versus surgery for initial treatment in advanced ovarian epithelial cancer. *Cochrane Database Syst Rev.* 2012(8):CD005343.

44

6. Pignata S, Scambia G, Katsaros D, Gallo C, Pujade-Lauraine E, De Placido S, et al. Carboplatin plus paclitaxel once a week versus every 3 weeks in patients with advanced ovarian cancer (MITO-7): a randomised, multicentre, open-label, phase 3 trial. *Lancet Oncol.* 2014;15(4):396-405.

45

7. Siesto G, Cavina R, Romano F, Vitobello D. Primary Debulking Surgery Versus Neoadjuvant Chemotherapy in Advanced Epithelial Ovarian Cancer: A Propensity-matched Analysis. *Am J Clin Oncol.* 2018;41(3):280-5.

46

8. Vergote I, Trope CG, Amant F, Kristensen GB, Ehlen T, Johnson N, et al. Neoadjuvant chemotherapy or primary surgery in stage IIIC or IV ovarian cancer. *N Engl J Med.* 2010;363(10):943-53.

47

9. Hanker LC, Loibl S, Burchardi N, Pfisterer J, Meier W, Pujade-Lauraine E, et al. The impact of second to sixth line therapy on survival of relapsed ovarian cancer after primary taxane/platinum-based therapy. *Ann Oncol.* 2012;23(10):2605-12.

48

10. Bhatt AP, Redinbo MR, Bultman SJ. The role of the microbiome in cancer development and therapy. *CA Cancer J Clin.* 2017;67(4):326-44.

49

11. Gopalakrishnan V, Helmink BA, Spencer CN, Reuben A, Wargo JA. The Influence of the Gut Microbiome on Cancer, Immunity, and Cancer Immunotherapy. *Cancer Cell.* 2018;33(4):570-80.

50

12. Gopalakrishnan V, Spencer CN, Nezi L, Reuben A, Andrews MC, Karpinets TV, et al. Gut microbiome modulates response to anti-PD-1 immunotherapy in melanoma patients. *Science.* 2018;359(6371):97-103.

51

13. Goubet AG, Daillere R, Routy B, Derosa L, P MR, Zitvogel L. The impact of the intestinal microbiota in therapeutic responses against cancer. *C R Biol.* 2018;341(5):284-9.

52

14. Iida N, Dzutsev A, Stewart CA, Smith L, Bouladoux N, Weingarten RA, et al. Commensal bacteria control cancer response to therapy by modulating the tumor microenvironment. *Science.* 2013;342(6161):967-70.

53

15. Kuczma MP, Ding ZC, Li T, Habtetsion T, Chen T, Hao Z, et al. The impact of antibiotic usage on the efficacy of chemoimmunotherapy is contingent on the source of tumor-reactive T cells. *Oncotarget.* 2017;8(67):111931-42.

54

16. Matson V, Fessler J, Bao R, Chongsuwat T, Zha Y, Alegre ML, et al. The commensal microbiome is associated with anti-PD-1 efficacy in metastatic melanoma patients. *Science.* 2018;359(6371):104-8.

55

17. Pflug N, Kluth S, Vehreschild JJ, Bahlo J, Tacke D, Biehl L, et al. Efficacy of antineoplastic treatment is associated with the use of antibiotics that modulate intestinal microbiota. *Oncoimmunology.* 2016;5(6):e1150399.

56

18. Routy B, Le Chatelier E, Derosa L, Duong CPM, Alou MT, Daillere R, et al. Gut microbiome influences efficacy of PD-1-based immunotherapy against epithelial tumors. *Science.* 2018;359(6371):91-7.

57

19. Heshiki Y, Vazquez-Urbe R, Li J, Ni Y, Quainoo S, Imamovic L, et al. Predictable modulation of cancer treatment outcomes by the gut microbiota. *Microbiome.* 2020;8(1):28.

58

- 15 20. Tran CW, McGree ME, Weaver AL, Martin JR, Lemens MA, Cliby WA, et al. Surgical site infection after  
16 primary surgery for epithelial ovarian cancer: predictors and impact on survival. *Gynecol Oncol.*  
17 2015;136(2):278-84.
- 18 21. Chambers LM KM, Esakov E, Braley C, Sangwan N, Michener CM, Rose PG, Debernardo R, Vargas  
19 R, Reizes O. . Antibiotic Therapy Worsens Outcomes Following Primary Treatment in Ovarian Cancer:  
20 Potential Role of the Gut Microbiome. 25th Annual Winter Meeting of the Society of Gynecologic Oncology;  
21 Aspen, Colorado, USA2020.
22. Chambers LM, Esakov E, Braley C, AlHilli M, Michener C, Reizes O. Use of Transabdominal  
23 Ultrasound for the detection of intra-peritoneal tumor engraftment and growth in mouse xenografts of epithelial  
24 ovarian cancer. *PLoS One.* 2020;15(4):e0228511.
25. Holtz DO, Krafty RT, Mohamed-Hadley A, Zhang L, Alagkiozidis I, Leiby B, et al. Should tumor VEGF  
26 expression influence decisions on combining low-dose chemotherapy with antiangiogenic therapy? Preclinical  
27 modeling in ovarian cancer. *J Transl Med.* 2008;6:2.
28. Wilkinson-Ryan I, Pham MM, Sergent P, Tafe LJ, Berwin BL. A Syngeneic Mouse Model of Epithelial  
29 Ovarian Cancer Port Site Metastases. *Transl Oncol.* 2019;12(1):62-8.
- 30 25. Cohen M, Petignat P. The bright side of ascites in ovarian cancer. *Cell Cycle.* 2014;13(15):2319.
- 31 26. Kipps E, Tan DS, Kaye SB. Meeting the challenge of ascites in ovarian cancer: new avenues for  
32 therapy and research. *Nat Rev Cancer.* 2013;13(4):273-82.
- 33 27. Cheng H, Wang Z, Cui L, Wen Y, Chen X, Gong F, et al. Opportunities and Challenges of the Human  
34 Microbiome in Ovarian Cancer. *Front Oncol.* 2020;10:163.
- 35 28. Kovacs T, Miko E, Ujlaki G, Sari Z, Bai P. The Microbiome as a Component of the Tumor  
36 Microenvironment. *Adv Exp Med Biol.* 2020;1225:137-53.
- 37 29. Zhou B, Sun C, Huang J, Xia M, Guo E, Li N, et al. The biodiversity Composition of Microbiome in  
38 Ovarian Carcinoma Patients. *Sci Rep.* 2019;9(1):1691.
- 39 30. Drakes ML, Stiff PJ. Regulation of Ovarian Cancer Prognosis by Immune Cells in the Tumor  
40 Microenvironment. *Cancers (Basel).* 2018;10(9).
- 41 31. Ishikawa F, Yasukawa M, Lyons B, Yoshida S, Miyamoto T, Yoshimoto G, et al. Development of  
42 functional human blood and immune systems in NOD/SCID/IL2 receptor {gamma} chain(null) mice. *Blood.*  
2005;106(5):1565-73.
- 43 32. Rakoff-Nahoum S, Paglino J, Eslami-Varzaneh F, Edberg S, Medzhitov R. Recognition of commensal  
44 microflora by toll-like receptors is required for intestinal homeostasis. *Cell.* 2004;118(2):229-41.
- 45 33. Wang Z, Klipfell E, Bennett BJ, Koeth R, Levison BS, Dugar B, et al. Gut flora metabolism of  
46 phosphatidylcholine promotes cardiovascular disease. *Nature.* 2011;472(7341):57-63.
- 47 34. Kim S, Covington A, Pamer EG. The intestinal microbiota: Antibiotics, colonization resistance, and  
48 enteric pathogens. *Immunol Rev.* 2017;279(1):90-105.
- 49 35. Iredell J, Brown J, Tagg K. Antibiotic resistance in Enterobacteriaceae: mechanisms and clinical  
50 implications. *BMJ.* 2016;352:h6420.
- 51 36. Kirby A, Santoni N. Antibiotic resistance in Enterobacteriaceae: what impact on the efficacy of antibiotic  
52 prophylaxis in colorectal surgery? *J Hosp Infect.* 2015;89(4):259-63.
- 53 37. Chiodini RJ, Dowd SE, Chamberlin WM, Galandiuk S, Davis B, Glassing A. Microbial Population  
54 Differentials between Mucosal and Submucosal Intestinal Tissues in Advanced Crohn's Disease of the Ileum.  
55 *PLoS One.* 2015;10(7):e0134382.
- 56 38. Huang C, Chen J, Wang J, Zhou H, Lu Y, Lou L, et al. Dysbiosis of Intestinal Microbiota and Decreased  
57 Antimicrobial Peptide Level in Paneth Cells during Hypertriglyceridemia-Related Acute Necrotizing Pancreatitis  
58 in Rats. *Front Microbiol.* 2017;8:776.
- 59 39. Chen JY, Miyanishi M, Wang SK, Yamazaki S, Sinha R, Kao KS, et al. Hoxb5 marks long-term  
60 haematopoietic stem cells and reveals a homogenous perivascular niche. *Nature.* 2016;530(7589):223-7.
- 61 40. Fischbach NA, Rozenfeld S, Shen W, Fong S, Chrobak D, Ginzinger D, et al. HOXB6 overexpression in  
62 murine bone marrow immortalizes a myelomonocytic precursor in vitro and causes hematopoietic stem cell  
63 expansion and acute myeloid leukemia in vivo. *Blood.* 2005;105(4):1456-66.
- 64 41. Ionta V, Liang W, Kim EH, Rafie R, Giacomello A, Marban E, et al. SHOX2 overexpression favors  
65 differentiation of embryonic stem cells into cardiac pacemaker cells, improving biological pacing ability. *Stem*  
66 *Cell Reports.* 2015;4(1):129-42.
- 67 42. Le Grand F, Jones AE, Seale V, Scime A, Rudnicki MA. Wnt7a activates the planar cell polarity  
68 pathway to drive the symmetric expansion of satellite stem cells. *Cell Stem Cell.* 2009;4(6):535-47.

43. Taghiyar L, Hesaraki M, Sayahpour FA, Satarian L, Hosseini S, Aghdami N, et al. Msh homeobox 1 (Msx1)- and Msx2-overexpressing bone marrow-derived mesenchymal stem cells resemble blastema cells and enhance regeneration in mice. *J Biol Chem*. 2017;292(25):10520-33.
44. Karantzali E, Lekakis V, Ioannou M, Hadjimichael C, Papamatheakis J, Kretsovali A. Sall1 regulates embryonic stem cell differentiation in association with nanog. *J Biol Chem*. 2011;286(2):1037-45.
45. Nagare RP, Sneha S, Sidhanth C, Roopa S, Murhekar K, Shirley S, et al. Expression of cancer stem cell markers CD24, EPHA1 and CD9 and their correlation with clinical outcome in epithelial ovarian tumours. *Cancer Biomark*. 2020.
46. Xia L, Gong Y, Zhang A, Cai S, Zeng Q. Loss of GATA5 expression due to gene promoter methylation induces growth and colony formation of hepatocellular carcinoma cells. *Oncol Lett*. 2016;11(1):861-9.
47. Yang L, Shi P, Zhao G, Xu J, Peng W, Zhang J, et al. Targeting cancer stem cell pathways for cancer therapy. *Signal Transduct Target Ther*. 2020;5:8.
48. Sneha S, Nagare RP, Sidhanth C, Krishnapriya S, Garg M, Ramachandran B, et al. The hedgehog pathway regulates cancer stem cells in serous adenocarcinoma of the ovary. *Cell Oncol (Dordr)*. 2020.
49. Gasparri ML, Bardhi E, Ruscito I, Papadia A, Farooqi AA, Marchetti C, et al. PI3K/AKT/mTOR Pathway in Ovarian Cancer Treatment: Are We on the Right Track? *Geburtshilfe Frauenheilkd*. 2017;77(10):1095-103.
50. Ju T, Kong JY, Stothard P, Willing BP. Defining the role of Parasutterella, a previously uncharacterized member of the core gut microbiota. *ISME J*. 2019;13(6):1520-34.
51. Sabini C, Sorbi F, Cunnea P, Fotopoulou C. Ovarian cancer stem cells: ready for prime time? *Arch Gynecol Obstet*. 2020;301(4):895-9.
52. Saygin C, Matei D, Majeti R, Reizes O, Lathia JD. Targeting Cancer Stemness in the Clinic: From Hype to Hope. *Cell Stem Cell*. 2019;24(1):25-40.
53. Saygin C, Wiechert A, Rao VS, Alluri R, Connor E, Thiagarajan PS, et al. CD55 regulates self-renewal and cisplatin resistance in endometrioid tumors. *J Exp Med*. 2017;214(9):2715-32.
54. Terraneo N, Jacob F, Dubrovskaja A, Grunberg J. Novel Therapeutic Strategies for Ovarian Cancer Stem Cells. *Front Oncol*. 2020;10:319.
55. Miyamoto T, Furusawa C, Kaneko K. Pluripotency, Differentiation, and Reprogramming: A Gene Expression Dynamics Model with Epigenetic Feedback Regulation. *PLoS Comput Biol*. 2015;11(8):e1004476.
56. Nguyen VHL, Hough R, Bernaudo S, Peng C. Wnt/beta-catenin signalling in ovarian cancer: Insights into its hyperactivation and function in tumorigenesis. *J Ovarian Res*. 2019;12(1):122.
57. Ryner L, Guan Y, Firestein R, Xiao Y, Choi Y, Rabe C, et al. Upregulation of Periostin and Reactive Stroma Is Associated with Primary Chemoresistance and Predicts Clinical Outcomes in Epithelial Ovarian Cancer. *Clin Cancer Res*. 2015;21(13):2941-51.
58. Callahan BJ, McMurdie PJ, Rosen MJ, Han AW, Johnson AJ, Holmes SP. DADA2: High-resolution sample inference from Illumina amplicon data. *Nat Methods*. 2016;13(7):581-3.
59. McMurdie PJ, Holmes S. phyloseq: an R package for reproducible interactive analysis and graphics of microbiome census data. *PLoS One*. 2013;8(4):e61217.
60. McMurdie PJ, Holmes S. Waste not, want not: why rarefying microbiome data is inadmissible. *PLoS Comput Biol*. 2014;10(4):e1003531.
61. Wickham H. *ggplot2: Elegant Graphics for Data Analysis*: Springer Publishing Company, Incorporated; 2009. 216 p.
62. Benjamini Y. Discovering the false discovery rate. *Journal of the Royal Statistical Society: Series B (Statistical Methodology)*. 2010;72(4):405-16.
63. Tiit E-M. *Nonparametric Statistical Methods*. Myles Hollander and Douglas A. Wolfe, Wiley, Chichester, 1999. No. of pages: xiii+779. Price: £ 39.95. ISBN 0-471-19045-4. *Statistics in Medicine*. 2000;19(10):1386-8.
64. Bronte V, Brandau S, Chen SH, Colombo MP, Frey AB, Greten TF, et al. Recommendations for myeloid-derived suppressor cell nomenclature and characterization standards. *Nat Commun*. 2016;7:12150.
65. Kopylova E, Noe L, Touzet H. SortMeRNA: fast and accurate filtering of ribosomal RNAs in metatranscriptomic data. *Bioinformatics*. 2012;28(24):3211-7.
66. Dobin A, Davis CA, Schlesinger F, Drenkow J, Zaleski C, Jha S, et al. STAR: ultrafast universal RNA-seq aligner. *Bioinformatics*. 2013;29(1):15-21.
67. Okonechnikov K, Conesa A, Garcia-Alcalde F. Qualimap 2: advanced multi-sample quality control for high-throughput sequencing data. *Bioinformatics*. 2016;32(2):292-4.
68. Wang L, Wang S, Li W. RSeQC: quality control of RNA-seq experiments. *Bioinformatics*. 2012;28(16):2184-5.

- 55 69. Daley T, Smith AD. Predicting the molecular complexity of sequencing libraries. *Nat Methods*.  
56 2013;10(4):325-7.
- 57 70. Liao Y, Smyth GK, Shi W. The Subread aligner: fast, accurate and scalable read mapping by seed-and-  
58 vote. *Nucleic Acids Res*. 2013;41(10):e108.
- 59 71. Team RDC. R: A language and environment for statistical computing. Vienna, Austria: R Foundation for  
60 Statistical Computing,; 2014.
- 61 72. Love MI, Huber W, Anders S. Moderated estimation of fold change and dispersion for RNA-seq data  
62 with DESeq2. *Genome Biol*. 2014;15(12):550.
- 63 73. Benjamini Y, Hochberg, Yosef. Controlling the false discovery rate: a practical and powerful approach  
64 to multiple testing. *Journal of the Royal Statistical Society*. 1995;57:289-300.
- 65 74. Bourgon R, Gentleman R, Huber W. Independent filtering increases detection power for high-  
66 throughput experiments. *Proc Natl Acad Sci U S A*. 2010;107(21):9546-51.
- 67 75. Huang da W, Sherman BT, Zheng X, Yang J, Imamichi T, Stephens R, et al. Extracting biological  
68 meaning from large gene lists with DAVID. *Curr Protoc Bioinformatics*. 2009;Chapter 13:Unit 13 1.
- 69 76. Alban TJ, Alvarado AG, Sorensen MD, Bayik D, Volovetz J, Serbinowski E, et al. Global immune  
70 fingerprinting in glioblastoma patient peripheral blood reveals immune-suppression signatures associated with  
71 prognosis. *JCI Insight*. 2018;3(21).
- 72 77. Bayik D, Zhou Y, Park C, Hong C, Vail D, Silver DJ, et al. Myeloid-derived suppressor cell subsets drive  
73 glioblastoma growth in a sex-specific manner. *Cancer Discov*. 2020.
- 74
- 75
- 76
- 77
- 78
- 79
- 80
- 81

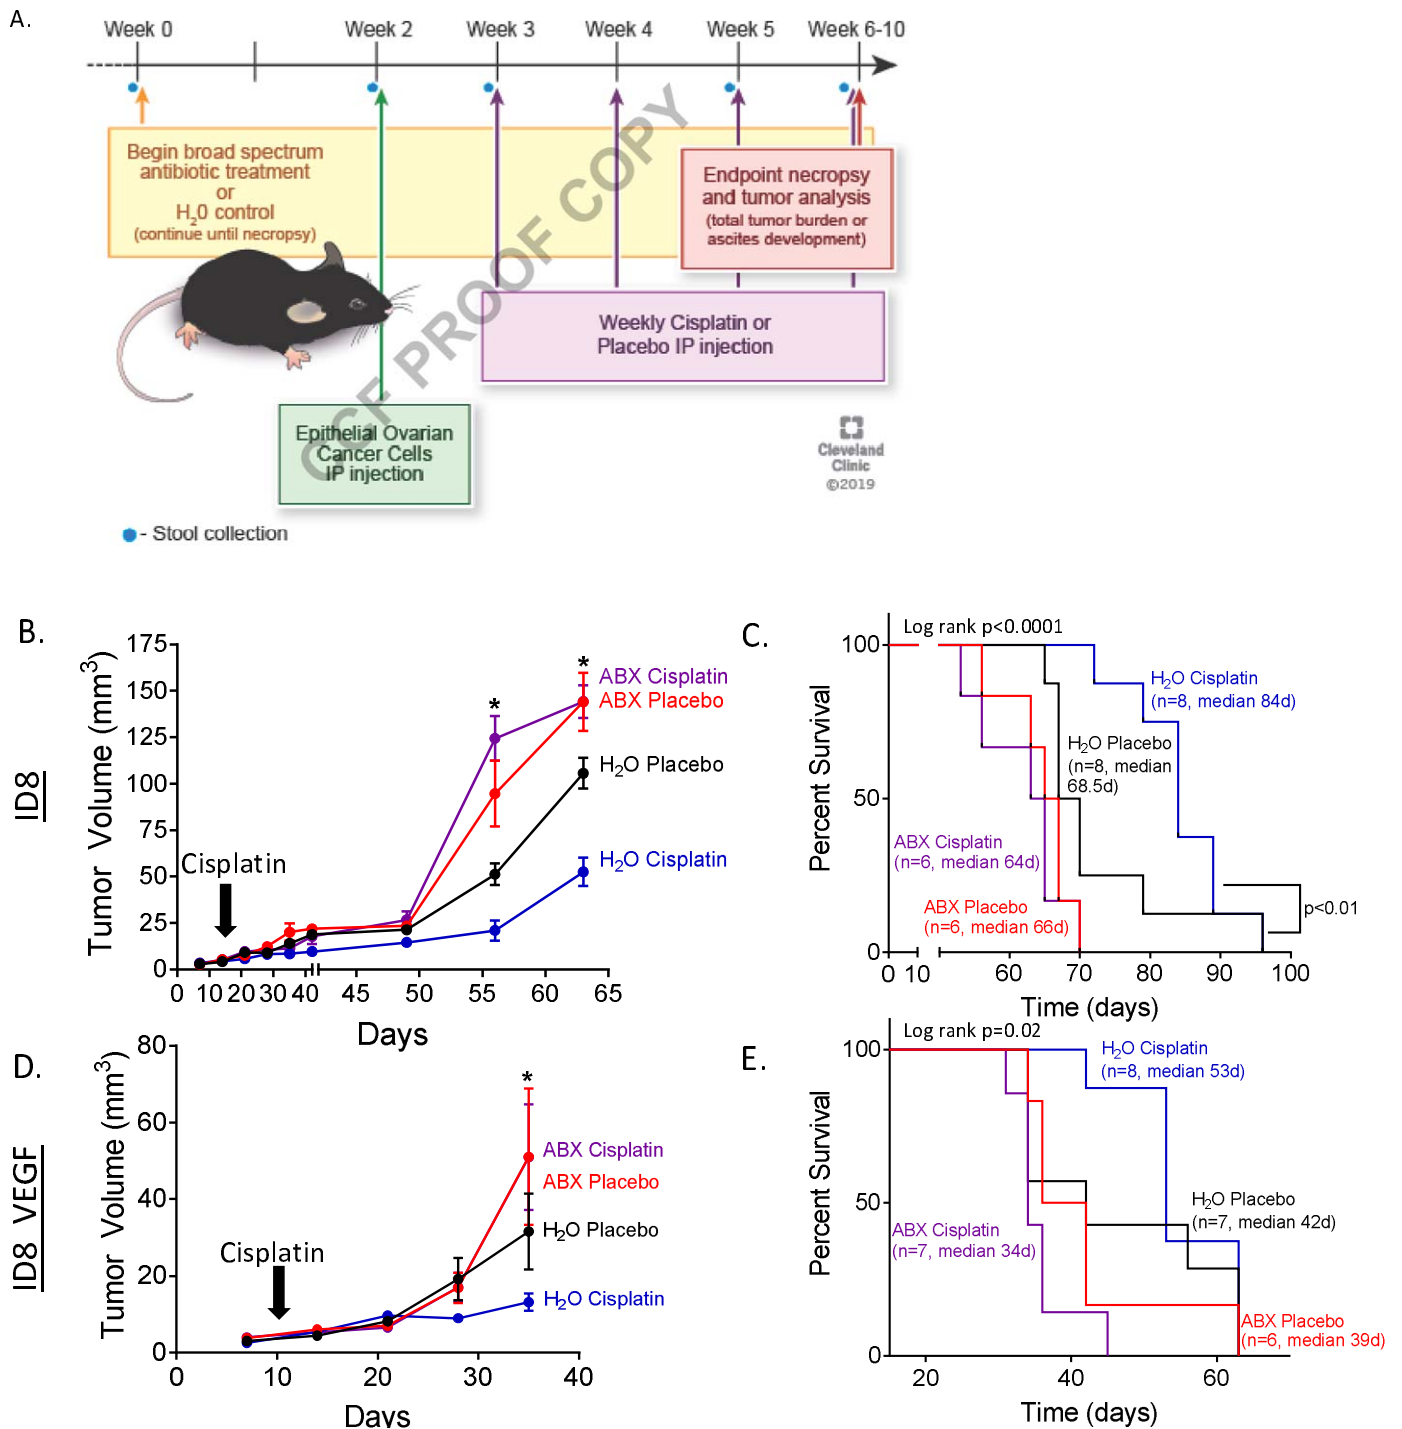

**Figure 1. Tumor growth is increased and median survival is decreased in ABX treated BI/6 mice, regardless of cisplatin therapy.** Mice treated with antibiotics following the schematic study design (A) exhibited increased tumor growth regardless of cisplatin therapy following injection of both ID8 (B) and ID8 VEGF (D) cells in C57 BL/6 mice. Antibiotic treated ID8 (C) and ID8 VEGF (E) injected C57 BI/6 mice (purple and red) had significantly decreased median survival compared to H<sub>2</sub>O treated mice (black and blue). (ABX Cis vs. H<sub>2</sub>O Cis, ID8 and ID8 VEGF  $p < 0.0002$ ) Further, cisplatin therapy increased H<sub>2</sub>O treated murine survival (blue vs black, ID8  $p < 0.01$ ), but did not alter ABX treated murine survival (purple vs red), in either cohort. Statistical analysis: Log rank (Mantel Cox) test.  $n = 8$  mice per group



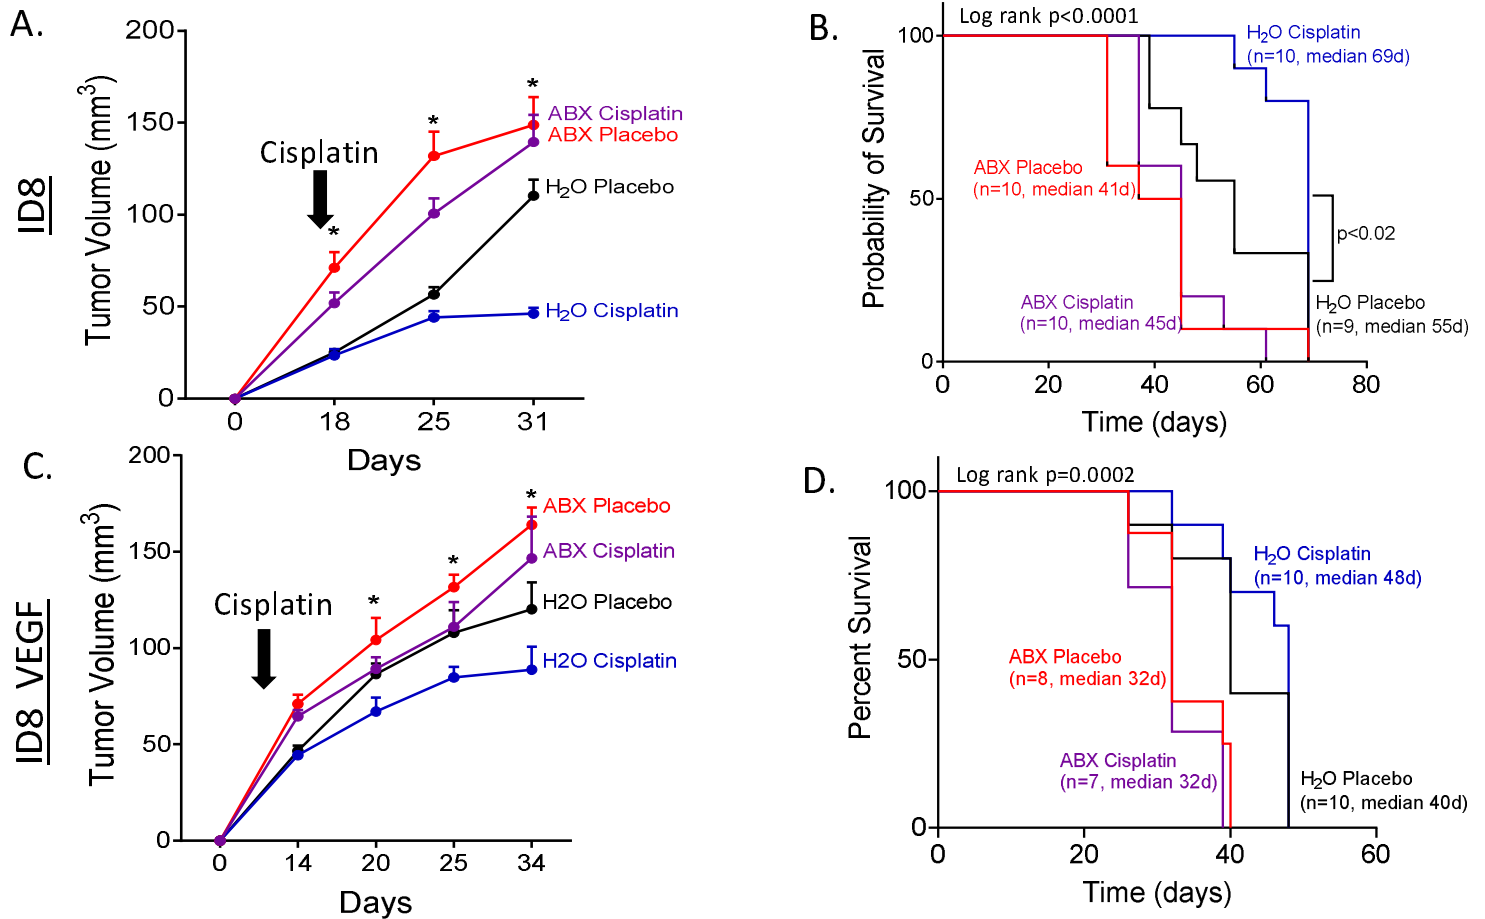

**Figure 2. Tumor growth is increased and median survival is decreased in ABX treated mice, regardless of cisplatin therapy in immune-deficient NSG mice.** Mice treated with antibiotics exhibited increased tumor growth regardless of cisplatin therapy following injection of both ID8 (A) and ID8 VEGF (C) cells in C57 BL/6 mice. Antibiotic treated ID8 (B) and ID8 VEGF (D) injected NSG mice (purple and red) had significantly decreased median survival compared to H<sub>2</sub>O treated mice (black and blue). Further, cisplatin therapy increased H<sub>2</sub>O treated murine survival (blue vs black), but did not alter ABX treated murine survival (purple vs red) (ID8 p<0.0001, ID8 VEGF p<0.0005), in either cohort. Statistical analysis: Log rank (Mantel Cox) test. n=8 mice per group

33  
34  
35  
36  
37  
38  
39

A.

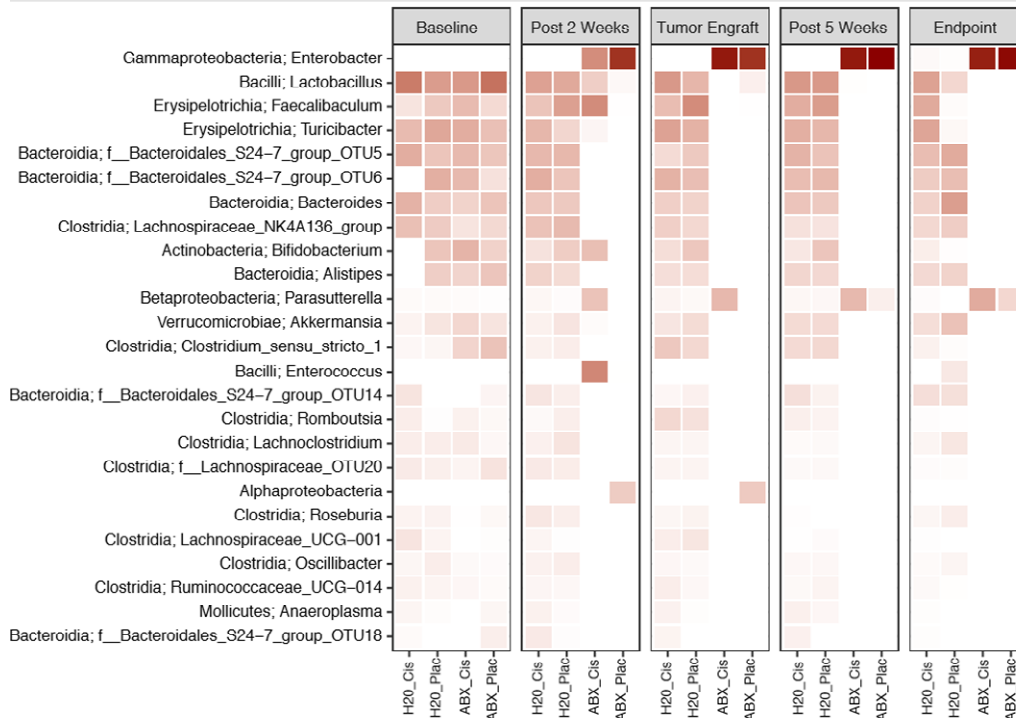

B.

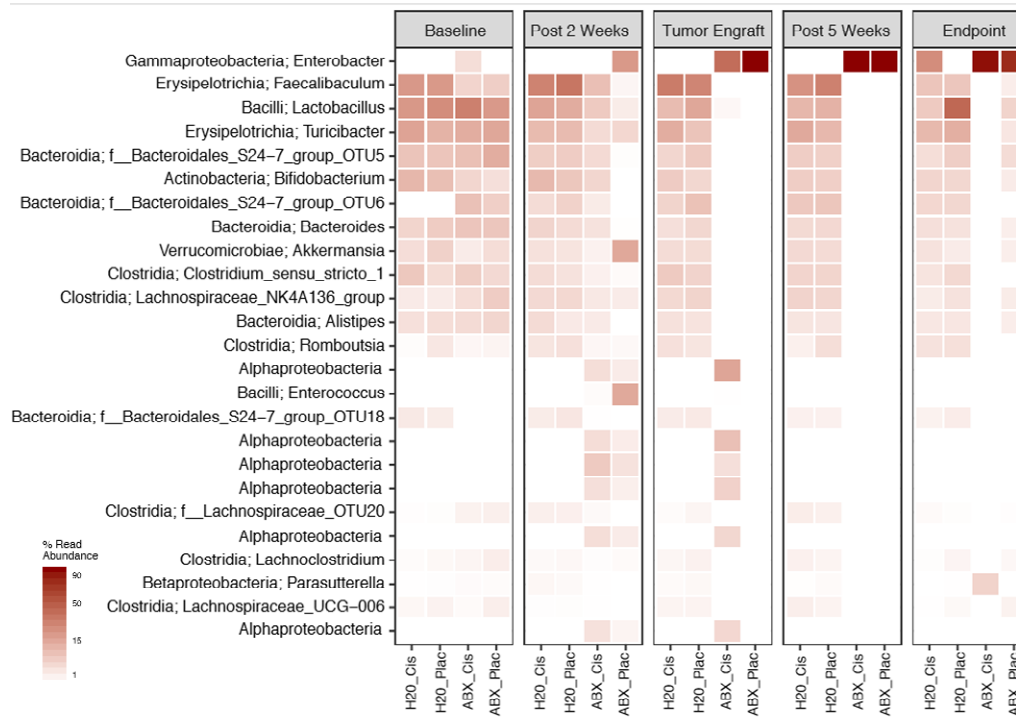

**Figure 3. ABX therapy results in microbial alterations over time in the gut microbiome of C57BL/6 mice.** Specific strains of bacteria are altered in the ID8 (A) and ID8 VEGF (B) cohorts of C57 BL/6 mice following antibiotic treatment over time. n= 8 mice per group

A.

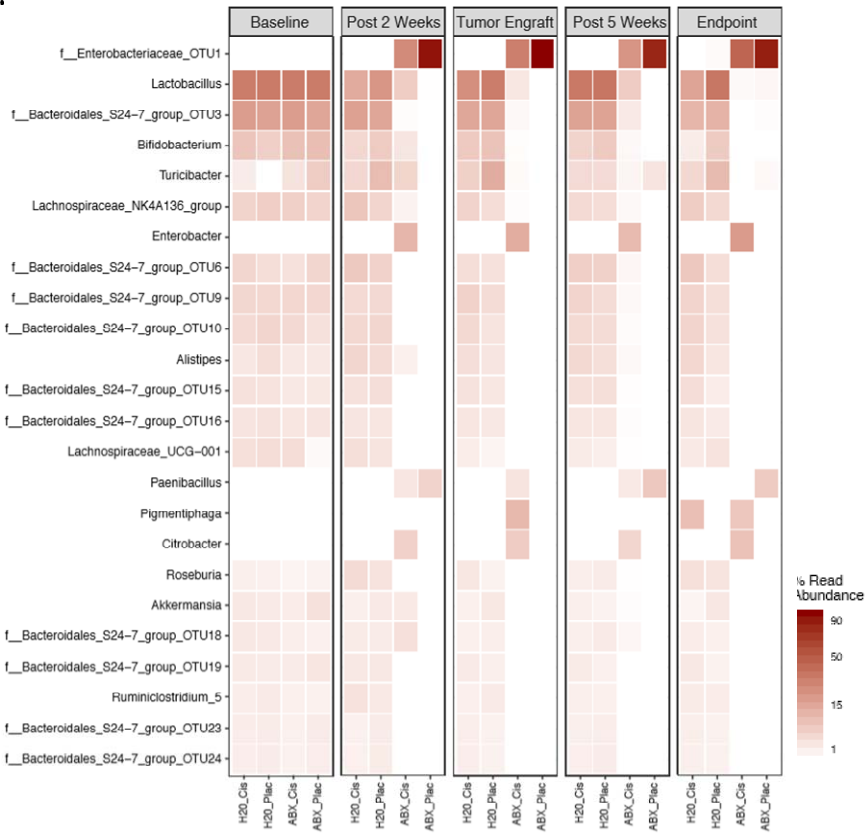

B.

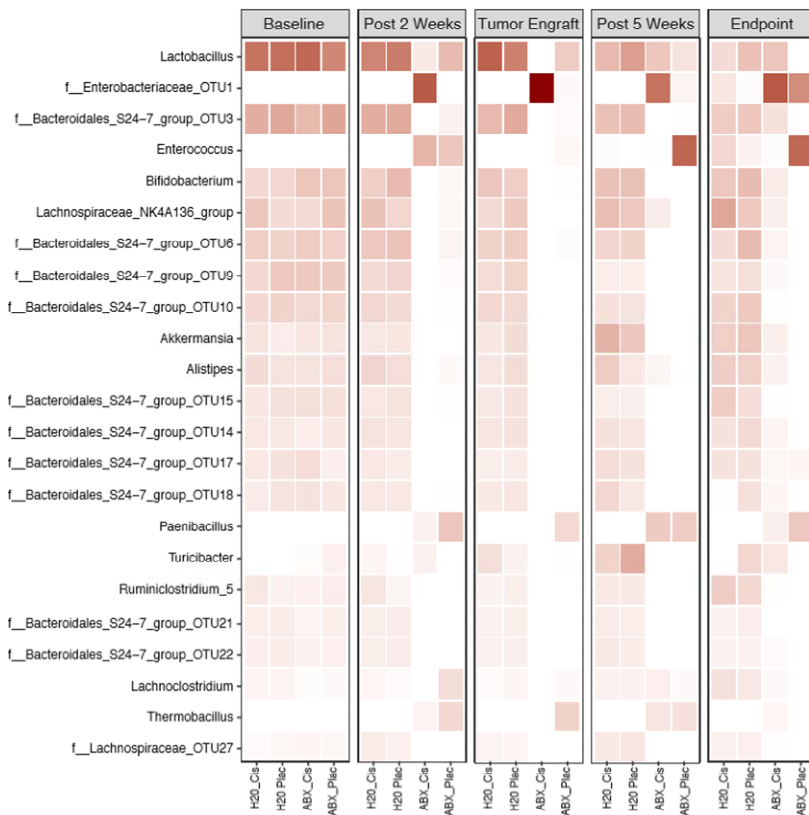

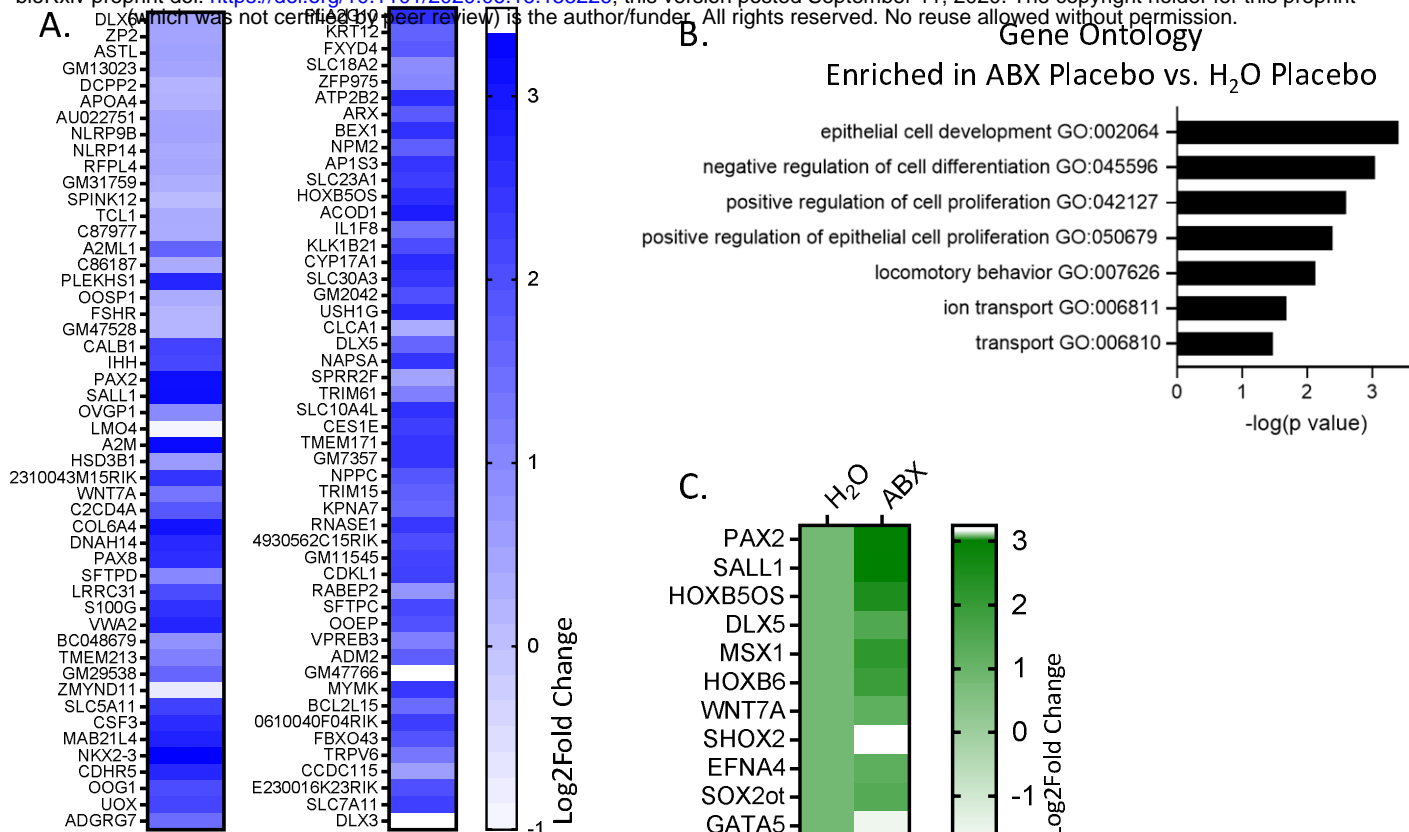

**Figure 5. RNAseq of NSG ID8 tumors at endpoint demonstrates differentially expressed genes between treatment groups.** (A) Top 100 differentially expressed genes (DEGs) ordered by p-value in the ABX Placebo group over the H<sub>2</sub>O Placebo group. (B) Top significant GO terms enriched in the ABX Placebo group over H<sub>2</sub>O Placebo group. (C) Stem cell genes enriched in the ABX Placebo group over the H<sub>2</sub>O Placebo group ordered by p-value. (D) KEGG pathways enriched in ABX Placebo group over H<sub>2</sub>O Placebo group, enriched genes with a p value <0.01 are denoted by red stars.

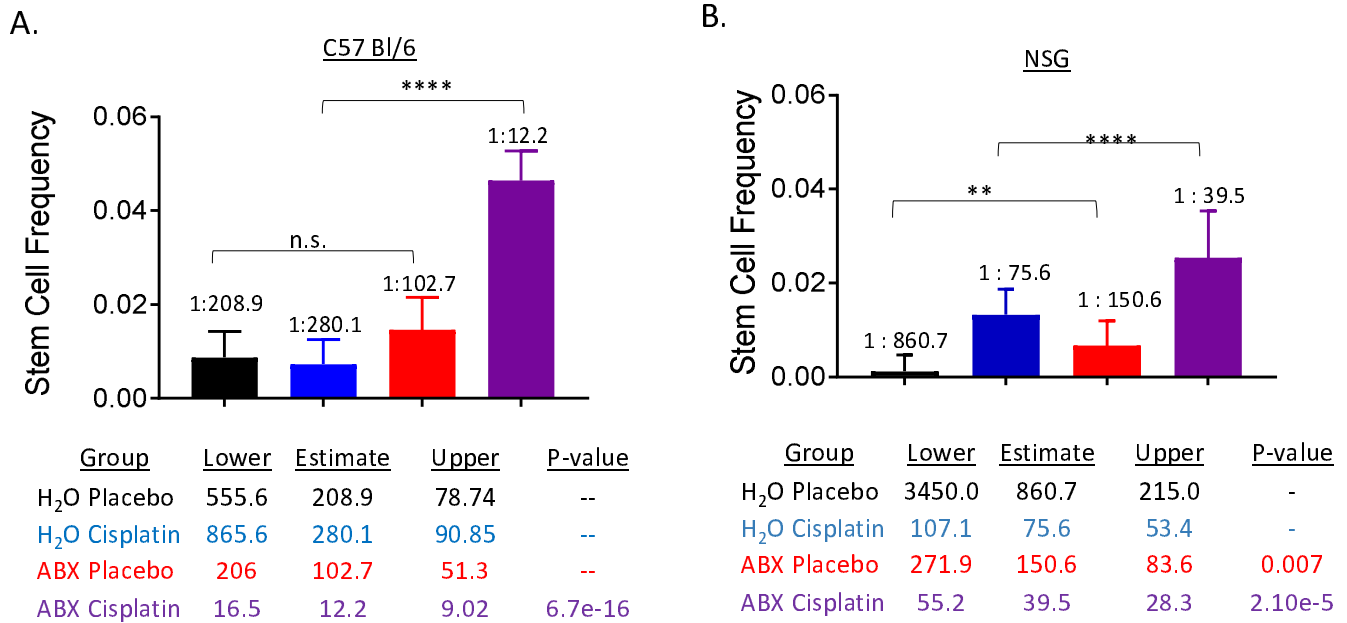

**Figure 6. Tumor sphere initiation frequency is increased in ABX treated mice and further increased upon cisplatin therapy.** ID8 tumor cells isolated from ABX treated mice had significantly increased tumor sphere initiation frequency in both BL/6 (A) and NSG (B) cohorts. Two stage t-tests \*\*\* $p < 0.001$ , \*\*\*\* $p < 0.0001$   $n = 4$  mice per group

33

34

35

36

37

38

39

40

41

42

43
